# Supplementary material for: Association of Serum Vitamin D Level with Temporomandibular Disorder Incidence: A Retrospective, Multi-Center Cohort Study Using Six Hospital Databases
Source: MDPI journal article supplement (doi:10.3390/nu15132860), 2023-06-24
Supplement: s1 [file s1]

**Table S1.** Participant baseline characteristics in the multicenter OMOP-CDM database.

|                  | Matched cohort after PS adjustment                     |                                                        |         |                                                        |                                                        |         |                                                         |                                                         |         |
|------------------|--------------------------------------------------------|--------------------------------------------------------|---------|--------------------------------------------------------|--------------------------------------------------------|---------|---------------------------------------------------------|---------------------------------------------------------|---------|
|                  | PNUH                                                   |                                                        |         | GNUH                                                   |                                                        |         | KHMC                                                    |                                                         |         |
|                  | Serum<br>25(OH)D<br>level ≥ 20<br>ng/mL<br>(N = 9,354) | Serum<br>25(OH)D<br>level < 20<br>ng/mL<br>(N = 7,054) | SD<br>% | Serum<br>25(OH)D<br>level ≥ 20<br>ng/mL<br>(N = 3,152) | Serum<br>25(OH)D<br>level < 20<br>ng/mL<br>(N = 2,019) | SD<br>% | Serum<br>25(OH)D<br>level ≥ 20<br>ng/mL<br>(N = 21,029) | Serum<br>25(OH)D<br>level < 20<br>ng/mL<br>(N = 14,997) | SD<br>% |
|                  | %                                                      |                                                        |         |                                                        |                                                        |         |                                                         |                                                         |         |
| <b>Age group</b> |                                                        |                                                        |         |                                                        |                                                        |         |                                                         |                                                         |         |
| 12–14 years      | 0.5                                                    | 0.4                                                    | -0.01   | 0.3                                                    | 0.7                                                    | 0.06    | 0.8                                                     | 1.0                                                     | 0.02    |
| 15–19 years      | 0.4                                                    | 0.6                                                    | 0.02    | 1.6                                                    | 1.5                                                    | 0.00    | 1.2                                                     | 1.3                                                     | 0.01    |
| 20–24 years      | 0.4                                                    | 0.5                                                    | 0.01    | 2.7                                                    | 2.3                                                    | -0.02   | 1.9                                                     | 1.7                                                     | -0.01   |
| 25–29 years      | 1.2                                                    | 1.2                                                    | 0.01    | 2.3                                                    | 1.9                                                    | -0.03   | 2.0                                                     | 1.8                                                     | -0.01   |
| 30–34 years      | 4.1                                                    | 4.4                                                    | 0.02    | 2.8                                                    | 2.8                                                    | 0.00    | 3.1                                                     | 3.2                                                     | 0.01    |
| 35–39 years      | 6.2                                                    | 6.1                                                    | 0.00    | 3.6                                                    | 3.7                                                    | 0.00    | 3.8                                                     | 3.8                                                     | 0.00    |
| 40–44 years      | 8.0                                                    | 7.7                                                    | -0.01   | 4.5                                                    | 4.0                                                    | -0.02   | 4.4                                                     | 4.5                                                     | 0.01    |
| 45–49 years      | 11.0                                                   | 10.8                                                   | 0.00    | 5.5                                                    | 5.7                                                    | 0.01    | 7.1                                                     | 6.8                                                     | -0.01   |
| 50–54 years      | 14.2                                                   | 14.6                                                   | 0.01    | 9.2                                                    | 10.2                                                   | 0.03    | 10.4                                                    | 10.7                                                    | 0.01    |
| 55–59 years      | 16.3                                                   | 16.3                                                   | 0.00    | 13.3                                                   | 13.2                                                   | 0.00    | 13.2                                                    | 14.1                                                    | 0.02    |
| 60–64 years      | 14.3                                                   | 14.8                                                   | 0.01    | 15.4                                                   | 13.2                                                   | -0.06   | 14.5                                                    | 13.8                                                    | -0.02   |
| 65–69 years      | 9.8                                                    | 9.8                                                    | 0.00    | 11.5                                                   | 12.3                                                   | 0.03    | 11.9                                                    | 12.2                                                    | 0.01    |
| 70–74 years      | 7.1                                                    | 6.7                                                    | -0.02   | 11.3                                                   | 11.5                                                   | 0.00    | 11.1                                                    | 11.2                                                    | 0.00    |
| 75–79 years      | 4.3                                                    | 4.0                                                    | -0.02   | 8.6                                                    | 9.2                                                    | 0.02    | 8.6                                                     | 8.0                                                     | -0.02   |
| 80–84 years      | 1.7                                                    | 1.4                                                    | -0.02   | 5.4                                                    | 5.2                                                    | -0.01   | 4.8                                                     | 4.4                                                     | -0.02   |
| 85–89 years      | 0.4                                                    | 0.6                                                    | 0.02    | 1.6                                                    | 2.1                                                    | 0.04    | 1.2                                                     | 1.1                                                     | -0.01   |
| 90–94 years      | 0.1                                                    | < 0.1                                                  | -0.02   | 0.4                                                    | 0.4                                                    | 0.01    | 0.3                                                     | 0.3                                                     | -0.01   |
| Sex              |                                                        |                                                        |         |                                                        |                                                        |         |                                                         |                                                         |         |
| Female           | 57.6                                                   | 57.7                                                   | 0.00    | 57.0                                                   | 56.5                                                   | -0.01   | 57.5                                                    | 58.1                                                    | 0.01    |
|                  | MJH                                                    |                                                        |         | WKUH                                                   |                                                        |         | DCMC                                                    |                                                         |         |
|                  | Serum<br>25(OH)D<br>level ≥ 20<br>ng/mL<br>(N = 5,344) | Serum<br>25(OH)D<br>level < 20<br>ng/mL<br>(N = 3,950) | SD<br>% | Serum<br>25(OH)D<br>level ≥ 20<br>ng/mL<br>(N = 3,615) | Serum<br>25(OH)D<br>level < 20<br>ng/mL<br>(N = 2,555) | SD<br>% | Serum<br>25(OH)D<br>level ≥ 20<br>ng/mL<br>(N = 4,865)  | Serum<br>25(OH)D<br>level < 20<br>ng/mL<br>(N = 3,985)  | SD<br>% |
|                  | %                                                      |                                                        |         |                                                        |                                                        |         |                                                         |                                                         |         |
|                  |                                                        |                                                        |         |                                                        |                                                        |         |                                                         |                                                         |         |
| <b>Age group</b> |                                                        |                                                        |         |                                                        |                                                        |         |                                                         |                                                         |         |

|             |      |      |       |      |      |       |      |      |       |
|-------------|------|------|-------|------|------|-------|------|------|-------|
| 12–14 years | 1.2  | 1.3  | 0.01  | -0.1 | 0.2  | 0.02  | 0.9  | 0.8  | 0.00  |
| 15–19 years | 1.4  | 1.2  | -0.01 | 0.6  | 1.3  | 0.08  | 0.4  | 0.7  | 0.04  |
| 20–24 years |      |      |       | 0.6  | 1.4  | 0.08  | 0.2  | 0.3  | 0.02  |
| 25–29 years | 2.2  | 2.0  | -0.01 | 0.8  | 1.8  | 0.09  | 1.2  | 1.3  | 0.00  |
| 30–34 years | 4.0  | 4.1  | 0.00  | 1.4  | 1.8  | 0.03  | 2.8  | 2.3  | -0.03 |
| 35–39 years | 9.7  | 10.3 | 0.02  | 2.1  | 2.9  | 0.05  | 5.1  | 5.0  | 0.00  |
| 40–44 years | 7.5  | 7.1  | -0.02 | 4.1  | 4.6  | 0.02  | 7.4  | 7.5  | 0.00  |
| 45–49 years | 8.1  | 8.7  | 0.02  | 6.6  | 7.6  | 0.04  | 11.7 | 11.8 | 0.00  |
| 50–54 years | 11.4 | 12.2 | 0.02  | 8.3  | 9.2  | 0.03  | 16.1 | 15.9 | -0.01 |
| 55–59 years | 13.2 | 11.6 | -0.05 | 11.6 | 11.3 | -0.01 | 15.6 | 15.8 | 0.01  |
| 60–64 years | 10.0 | 10.5 | 0.02  | 14.2 | 11.5 | -0.08 | 13.5 | 13.9 | 0.01  |
| 65–69 years | 7.9  | 8.1  | 0.00  | 11.6 | 11.8 | 0.01  |      |      |       |
| 70–74 years | 6.9  | 7.0  | 0.01  | 10.9 | 10.5 | -0.01 | 7.1  | 7.3  | 0.01  |
| 75–79 years | 7.6  | 7.5  | 0.00  | 12.2 | 10.5 | -0.05 | 4.8  | 4.6  | -0.01 |
| 80–84 years | 4.9  | 4.6  | -0.01 | 10.0 | 8.6  | -0.05 | 2.7  | 2.2  | -0.04 |
| 85–89 years | 2.3  | 2.0  | -0.02 | 3.9  | 3.9  | 0.00  | 0.7  | 0.8  | 0.01  |
| 90–94 years | 0.5  | 0.7  | 0.03  | 0.9  | 1.0  | 0.00  | -0.1 | -0.1 | -0.01 |
| Sex         |      |      |       |      |      |       |      |      |       |
| Female      | 54.6 | 55.5 | 0.02  | 55.2 | 56.0 | 0.02  | 53.6 | 52.9 | -0.01 |

OMOP-CDM: Observational Medical Outcomes Partnership-Common Data Model; N: number; PS: propensity score; SD: standard difference; PNUH: Pusan National University Hospital; GNUH: Gyeongsang National University Hospital; KHMC: Kyung Hee University Hospital; MJH: Myongji Hospital; WKUH: Wonkwang University Hospital; DCMC: Daegu Catholic University Hospital.

**Table S2.** Participant clinical characteristics in the study cohorts.

| %                                             | Matched cohort after PS adjustment                     |                                                        |         |                                                        |                                                        |         |                                                         |                                                         |         |
|-----------------------------------------------|--------------------------------------------------------|--------------------------------------------------------|---------|--------------------------------------------------------|--------------------------------------------------------|---------|---------------------------------------------------------|---------------------------------------------------------|---------|
|                                               | PNUH                                                   |                                                        |         | GNUH                                                   |                                                        |         | KHMC                                                    |                                                         |         |
|                                               | Serum<br>25(OH)D<br>level ≥ 20<br>ng/mL<br>(N = 9,354) | Serum<br>25(OH)D<br>level < 20<br>ng/mL<br>(N = 7,054) | SD<br>% | Serum<br>25(OH)D<br>level ≥ 20<br>ng/mL<br>(N = 3,152) | Serum<br>25(OH)D<br>level < 20<br>ng/mL<br>(N = 2,019) | SD<br>% | Serum<br>25(OH)D<br>level ≥ 20<br>ng/mL<br>(N = 21,029) | Serum<br>25(OH)D<br>level < 20<br>ng/mL<br>(N = 14,997) | SD<br>% |
|                                               |                                                        |                                                        |         |                                                        |                                                        |         |                                                         |                                                         |         |
| <b>Medical history</b>                        |                                                        |                                                        |         |                                                        |                                                        |         |                                                         |                                                         |         |
| Acute respiratory disease                     | 0.4                                                    | 0.6                                                    | 0.02    | 3.8                                                    | 4.4                                                    | 0.03    | 1.7                                                     | 1.6                                                     | -0.01   |
| Chronic liver disease                         | 0.6                                                    | 1.0                                                    | 0.04    | 2.4                                                    | 2.9                                                    | 0.03    | 2.0                                                     | 2.0                                                     | 0.00    |
| Chronic obstructive lung disease              | 1.7                                                    | 1.9                                                    | 0.02    | 3.8                                                    | 4.1                                                    | 0.01    | 1.3                                                     | 1.4                                                     | 0.01    |
| Crohn's disease                               | 0.1                                                    | < 0.2                                                  | 0.00    | 0.5                                                    | 0.7                                                    | 0.04    | 0.7                                                     | 0.9                                                     | 0.02    |
| Dementia                                      | 0.3                                                    | 0.2                                                    | -0.02   | 1.3                                                    | 1.1                                                    | -0.02   | 1.7                                                     | 2.0                                                     | 0.02    |
| Depressive disorder                           | 1.9                                                    | 1.6                                                    | -0.02   | 8.7                                                    | 8.5                                                    | -0.01   | 3.2                                                     | 3.2                                                     | 0.00    |
| Diabetes mellitus                             | 5.3                                                    | 5.0                                                    | -0.01   | 3.9                                                    | 4.1                                                    | 0.01    | 8.3                                                     | 8.5                                                     | 0.01    |
| Gastroesophageal reflux disease               | 3.3                                                    | 3.7                                                    | 0.02    | 1.8                                                    | 2.1                                                    | 0.02    | 9.1                                                     | 9.3                                                     | 0.01    |
| Gastrointestinal hemorrhage                   | 0.4                                                    | 0.5                                                    | 0.02    | 1.2                                                    | 1.6                                                    | 0.04    | 1.6                                                     | 1.5                                                     | 0.00    |
| Hyperlipidemia                                | 4.7                                                    | 4.6                                                    | -0.01   | -0.1                                                   | -0.2                                                   | 0.01    | 22.9                                                    | 23.8                                                    | 0.02    |
| Hypertensive disorder                         | 3.7                                                    | 3.9                                                    | 0.01    | 1.6                                                    | 1.6                                                    | 0.00    | 21.1                                                    | 21.5                                                    | 0.01    |
| Lesion of liver                               | 8.3                                                    | 7.9                                                    | -0.02   | 6.2                                                    | 6.0                                                    | 0.00    | 1.6                                                     | 1.6                                                     | 0.00    |
| Obesity                                       | 0.7                                                    | 1.1                                                    | 0.04    | 2.1                                                    | 2.3                                                    | 0.02    | 0.4                                                     | 0.4                                                     | 0.01    |
| Osteoarthritis                                | 0.2                                                    | 0.5                                                    | 0.05    | 1.7                                                    | 1.4                                                    | -0.02   | 7.6                                                     | 7.5                                                     | 0.00    |
| Pneumonia                                     | 0.9                                                    | 0.5                                                    | -0.05   | 3.4                                                    | 3.5                                                    | 0.01    | 1.3                                                     | 1.1                                                     | -0.02   |
| Psoriasis                                     | 1.1                                                    | 0.9                                                    | -0.02   | 0.4                                                    | 0.2                                                    | -0.02   | 1.2                                                     | 0.9                                                     | -0.02   |
| Renal impairment                              | 0.2                                                    | 0.2                                                    | 0.01    | 7.2                                                    | 6.5                                                    | -0.03   | 2.8                                                     | 2.8                                                     | 0.00    |
| Rheumatoid arthritis                          | 0.7                                                    | 0.9                                                    | 0.03    | 3.9                                                    | 3.4                                                    | -0.03   | 0.9                                                     | 0.8                                                     | 0.00    |
| Schizophrenia                                 | 0.2                                                    | < 0.2                                                  | -0.02   | 2.4                                                    | 2.5                                                    | 0.00    | 0.2                                                     | 0.2                                                     | 0.00    |
| Ulcerative colitis                            | < 0.1                                                  | < 0.2                                                  | 0.03    | 1.0                                                    | 0.9                                                    | -0.01   | 0.6                                                     | 0.6                                                     | 0.00    |
| Urinary tract infectious disease              | 0.4                                                    | 0.6                                                    | 0.02    | 0.6                                                    | 0.6                                                    | 0.00    | 1.3                                                     | 1.2                                                     | -0.01   |
| Viral hepatitis C                             | 0.5                                                    | 0.6                                                    | 0.01    | 0.8                                                    | 0.8                                                    | 0.01    | 0.2                                                     | 0.1                                                     | 0.00    |
| Visual system disorder                        | 3.6                                                    | 3.4                                                    | 0.00    | 9.8                                                    | 9.0                                                    | -0.03   | 6.6                                                     | 6.6                                                     | 0.00    |
| Medication use                                |                                                        |                                                        |         |                                                        |                                                        |         |                                                         |                                                         |         |
| Agents acting on the renin-angiotensin system | 5.6                                                    | 5.9                                                    | 0.02    | 22.4                                                   | 21.7                                                   | -0.02   | 16.0                                                    | 16.4                                                    | 0.01    |
| Antibacterials for systemic use               | 16.3                                                   | 15.6                                                   | -0.02   | 31.8                                                   | 32.1                                                   | 0.01    | 22.5                                                    | 22.3                                                    | 0.00    |
| Antidepressants                               | 8.1                                                    | 7.9                                                    | -0.01   | 25.9                                                   | 25.3                                                   | -0.01   | 8.9                                                     | 8.9                                                     | 0.00    |
| Antiepileptics                                | 5.3                                                    | 5.2                                                    | 0.00    | 15.1                                                   | 13.4                                                   | -0.05   | 11.1                                                    | 11.1                                                    | 0.00    |
| Anti-inflammatory and antirheumatic products  | 13.4                                                   | 13.3                                                   | 0.00    | 27.2                                                   | 26.7                                                   | -0.01   | 38.7                                                    | 38.9                                                    | 0.00    |
| Antineoplastic agents                         | 4.3                                                    | 4.1                                                    | -0.01   | 7.4                                                    | 7.4                                                    | 0.00    | 14.8                                                    | 15.0                                                    | 0.01    |
| Antipsoriatics                                | 0.8                                                    | 0.5                                                    | -0.03   |                                                        |                                                        |         | 3.6                                                     | 3.3                                                     | -0.02   |
| Antithrombotic agents                         | 10.4                                                   | 10.1                                                   | -0.01   | 21.9                                                   | 21.5                                                   | -0.01   | 23.1                                                    | 23.1                                                    | 0.00    |
| Beta blocking agents                          | 5.3                                                    | 5.3                                                    | 0.00    | 17.6                                                   | 16.3                                                   | -0.04   | 13.3                                                    | 13.7                                                    | 0.01    |
| Calcium channel blockers                      | 6.1                                                    | 6.1                                                    | 0.00    | 20.9                                                   | 20.9                                                   | 0.00    | 15.7                                                    | 15.8                                                    | 0.00    |
| Diuretics                                     | 5.2                                                    | 5.3                                                    | 0.01    | 15.5                                                   | 14.9                                                   | -0.02   | 12.1                                                    | 11.9                                                    | -0.01   |

|                                                       |                                                 |                                            |       |                                                  |                                            |       |                                                 |                                            |       |
|-------------------------------------------------------|-------------------------------------------------|--------------------------------------------|-------|--------------------------------------------------|--------------------------------------------|-------|-------------------------------------------------|--------------------------------------------|-------|
| Drugs for acid-related disorders                      | 32.9                                            | 33.8                                       | 0.02  | 51.9                                             | 53.1                                       | 0.02  | 46.8                                            | 46.7                                       | 0.00  |
| Drugs for obstructive airway diseases                 | 4.4                                             | 4.5                                        | 0.00  | 25.8                                             | 27.0                                       | 0.03  | 19.4                                            | 19.6                                       | 0.00  |
| Drugs used in diabetes                                | 4.3                                             | 4.5                                        | 0.01  | 21.9                                             | 21.0                                       | -0.02 | 10.9                                            | 11.0                                       | 0.00  |
| Immunosuppressants                                    | 1.3                                             | 1.5                                        | 0.02  | 5.0                                              | 4.8                                        | -0.01 | 8.3                                             | 8.1                                        | -0.01 |
| Lipid modifying agents                                | 8.4                                             | 7.8                                        | -0.02 | 25.6                                             | 25.9                                       | 0.01  | 23.9                                            | 24.4                                       | 0.01  |
| Opioids                                               | 35.3                                            | 36.1                                       | 0.02  | 31.9                                             | 32.0                                       | 0.00  | 25.2                                            | 25.0                                       | 0.00  |
| Psycholeptics                                         | 41.5                                            | 43.6                                       | 0.04  | 41.8                                             | 38.9                                       | -0.06 | 25.1                                            | 25.6                                       | 0.01  |
| Psychostimulants, agents used for ADHD and nootropics | 0.6                                             | 1.0                                        | 0.04  | 2.1                                              | 1.7                                        | -0.03 | 2.0                                             | 58.1                                       | 0.01  |
| <hr/>                                                 |                                                 |                                            |       |                                                  |                                            |       |                                                 |                                            |       |
| %                                                     | MJH                                             |                                            |       | WKUH                                             |                                            |       | DCMC                                            |                                            |       |
|                                                       | Serum 25(OH)D level $\geq$ 20 ng/mL (N = 5,344) | Serum 25(OH)D level < 20 ng/mL (N = 3,950) | SD %  | Serum 25(OH)D level $\geq$ 20 ng/mL (N = 11,165) | Serum 25(OH)D level < 20 ng/mL (N = 5,853) | SD %  | Serum 25(OH)D level $\geq$ 20 ng/mL (N = 4,865) | Serum 25(OH)D level < 20 ng/mL (N = 3,985) | SD %  |
| <hr/>                                                 |                                                 |                                            |       |                                                  |                                            |       |                                                 |                                            |       |
| Medical history                                       |                                                 |                                            |       |                                                  |                                            |       |                                                 |                                            |       |
| Acute respiratory disease                             | 3.1                                             | 3.4                                        | 0.01  | 2.0                                              | 1.3                                        | -0.05 | 1.9                                             | 1.9                                        | -0.01 |
| Chronic liver disease                                 | 1.2                                             | 1.1                                        | -0.01 | 1.8                                              | 2.0                                        | 0.01  | 1.1                                             | 1.2                                        | 0.01  |
| Chronic obstructive lung disease                      | 0.6                                             | 0.6                                        | 0.00  | 0.9                                              | 1.2                                        | 0.03  | 0.5                                             | 0.7                                        | 0.02  |
| Crohn's disease                                       |                                                 |                                            |       |                                                  |                                            |       | 0.5                                             | 0.7                                        | 0.02  |
| Dementia                                              | 3.9                                             | 3.8                                        | -0.01 | 5.8                                              | 5.6                                        | -0.01 | 0.1                                             | 0.2                                        | 0.02  |
| Depressive disorder                                   | 6.5                                             | 6.3                                        | -0.01 | 4.8                                              | 4.7                                        | -0.01 | 0.5                                             | 0.6                                        | 0.01  |
| Diabetes mellitus                                     | 10.1                                            | 10.3                                       | 0.01  | 11.9                                             | 11.4                                       | -0.01 | 1.3                                             | 1.1                                        | -0.01 |
| Gastroesophageal reflux disease                       | 16.2                                            | 15.9                                       | -0.01 | 3.0                                              | 2.9                                        | -0.01 | 5.3                                             | 5.1                                        | -0.01 |
| Gastrointestinal hemorrhage                           | 0.6                                             | 0.7                                        | 0.00  | 1.5                                              | 1.4                                        | 0.00  | 6.0                                             | 5.7                                        | -0.01 |
| Hyperlipidemia                                        | 25.1                                            | 25.5                                       | 0.01  | 21.2                                             | 21.4                                       | 0.01  | 0.7                                             | 0.6                                        | -0.02 |
| Hypertensive disorder                                 | 21.2                                            | 20.7                                       | -0.01 | 36.9                                             | 35.4                                       | -0.03 | 12.7                                            | 12.4                                       | -0.01 |
| Lesion of liver                                       | 1.0                                             | 1.1                                        | 0.00  | 3.0                                              | 2.5                                        | -0.03 | 11.1                                            | 9.9                                        | -0.04 |
| Obesity                                               | 0.6                                             | 1.1                                        | 0.05  |                                                  |                                            |       | 1.4                                             | 1.7                                        | 0.03  |
| Osteoarthritis                                        | 1.8                                             | 2.0                                        | 0.01  | 2.0                                              | 2.7                                        | 0.05  | 0.2                                             | 0.6                                        | 0.05  |
| Pneumonia                                             | 1.8                                             | 1.2                                        | -0.04 | 3.3                                              | 3.1                                        | -0.01 | 1.5                                             | 1.5                                        | 0.00  |
| Psoriasis                                             | 0.4                                             | < 0.1                                      | -0.05 | 0.1                                              | 0.3                                        | 0.03  | 1.2                                             | 1.2                                        | 0.00  |
| Renal impairment                                      | 2.7                                             | 2.6                                        | 0.00  | 22.6                                             | 22.3                                       | -0.01 | 0.3                                             | 0.2                                        | -0.02 |
| Rheumatoid arthritis                                  | 0.8                                             | 0.9                                        | 0.01  | 0.2                                              | 0.3                                        | 0.01  | 4.2                                             | 3.1                                        | -0.06 |
| Schizophrenia                                         | 1.4                                             | 1.3                                        | 0.00  | 0.2                                              | -0.2                                       | -0.03 | 0.1                                             | -0.1                                       | -0.02 |
| Ulcerative colitis                                    |                                                 |                                            |       | 0.2                                              | 0.2                                        | 0.00  | -0.1                                            | -0.1                                       | 0.01  |
| Urinary tract infectious disease                      | 1.5                                             | 1.4                                        | 0.00  | 1.8                                              | 2.4                                        | 0.04  | 0.9                                             | 0.7                                        | -0.02 |
| Viral hepatitis C                                     | 0.2                                             | 0.2                                        | 0.00  | 0.3                                              | 0.2                                        | -0.02 | 0.2                                             | 0.2                                        | 0.00  |
| Visual system disorder                                | 8.6                                             | 8.2                                        | -0.01 | 7.8                                              | 7.7                                        | 0.00  | 6.7                                             | 6.2                                        | -0.02 |
| Medication use                                        |                                                 |                                            |       |                                                  |                                            |       |                                                 |                                            |       |
| Agents acting on the renin-angiotensin system         | 16.9                                            | 17.2                                       | 0.01  | 32.5                                             | 31.4                                       | -0.02 | 8.7                                             | 8.4                                        | -0.01 |
| Antibacterials for systemic use                       | 25.6                                            | 23.5                                       | -0.05 | 39.5                                             | 35.9                                       | -0.07 | 13.1                                            | 11.8                                       | -0.04 |

|                                                             |      |      |       |      |      |       |      |      |       |
|-------------------------------------------------------------|------|------|-------|------|------|-------|------|------|-------|
| Antidepressants                                             | 18.6 | 16.9 | -0.04 | 37.1 | 33.9 | -0.07 | 5.9  | 5.8  | 0.00  |
| Antiepileptics                                              | 9.5  | 9.4  | 0.00  | 15.2 | 14.2 | -0.03 | 5.7  | 5.3  | -0.02 |
| Anti-inflammatory and<br>antirheumatic products             | 32.5 | 31.8 | -0.02 | 44.3 | 40.5 | -0.08 | 22.0 | 22.4 | 0.01  |
| Antineoplastic agents                                       | 5.7  | 5.6  | 0.00  | 14.3 | 15.0 | 0.02  | 11.4 | 11.3 | 0.00  |
| Antipsoriatics                                              | 0.9  | 0.8  | 0.00  | 1.7  | 1.4  | -0.02 | 0.8  | 0.7  | -0.02 |
| Antithrombotic agents                                       | 20.9 | 19.8 | -0.03 | 39.7 | 36.7 | -0.06 | 9.8  | 9.5  | -0.01 |
| Beta blocking agents                                        | 10.0 | 10.2 | 0.01  | 16.8 | 16.2 | -0.02 | 6.2  | 6.1  | 0.00  |
| Calcium channel blockers                                    | 15.1 | 14.5 | -0.02 | 29.9 | 28.6 | -0.03 | 7.6  | 6.9  | -0.03 |
| Diuretics                                                   | 11.6 | 11.2 | -0.01 | 22.2 | 19.7 | -0.06 | 9.0  | 8.1  | -0.03 |
| Drugs for acid-related<br>disorders                         | 36.8 | 35.5 | -0.03 | 57.4 | 54.8 | -0.05 | 9.0  | 8.1  | -0.03 |
| Drugs for obstructive<br>airway diseases                    | 11.8 | 11.1 | -0.02 | 25.5 | 23.8 | -0.04 | 32.0 | 31.6 | -0.01 |
| Drugs used in diabetes                                      | 16.3 | 16.7 | 0.01  | 25.9 | 24.5 | -0.03 | 11.3 | 10.6 | -0.02 |
| Immunosuppressants                                          | 3.1  | 3.0  | -0.01 | 6.5  | 7.3  | 0.03  | 5.8  | 5.2  | -0.03 |
| Lipid modifying agents                                      | 24.4 | 24.2 | 0.00  | 36.5 | 35.8 | -0.02 | 12.2 | 11.8 | -0.01 |
| Opioids                                                     | 32.3 | 30.8 | -0.03 | 38.4 | 35.4 | -0.06 | 41.1 | 42.0 | 0.02  |
| Psycholeptics                                               | 37.3 | 37.1 | 0.00  | 33.1 | 30.3 | -0.06 | 61.5 | 62.2 | 0.02  |
| Psychostimulants, agents<br>used for ADHD and<br>nootropics | 2.0  | 1.9  | -0.01 | 6.3  | 5.5  | -0.03 | 1.1  | 0.7  | -0.04 |

---

N: number; PS: propensity score; ADHD: Attention deficit hyperactivity disorder; PNUH: Pusan National University Hospital; GNUH: Gyeongsang National University Hospital; KHMC: Kyung Hee University Hospital; MJH: Myongji Hospital; WKUH: Wonkwang University Hospital; DCMC: Daegu Catholic University Hospital.
